# Supplementary material for: Identification of a Novel Polerovirus in Cocoa (Theobroma cacao) Germplasm and Development of Molecular Methods for Use in Diagnostics
Source: MDPI journal article supplement (doi:10.3390/pathogens12111284), 2023-10-26
Supplement: s1 [file s1]

Identification of a novel polerovirus in cocoa (*Theobroma cacao*) germplasm and development of molecular methods for use in diagnostics.

Ihsan Ullah, Muhammad Kamran and Jim M. Dunwell

Supplementary Figures

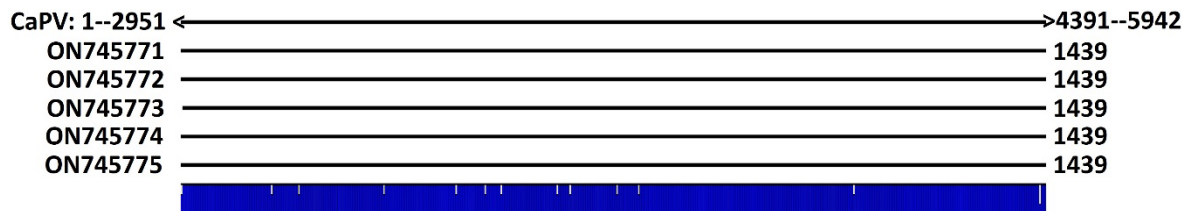

**Figure S1.** Multiple sequence alignment of the de novo assembled cacao polerovirus contig (CaPV) discovered in this study and the previously reported five partial sequences of cacao leafroll virus.

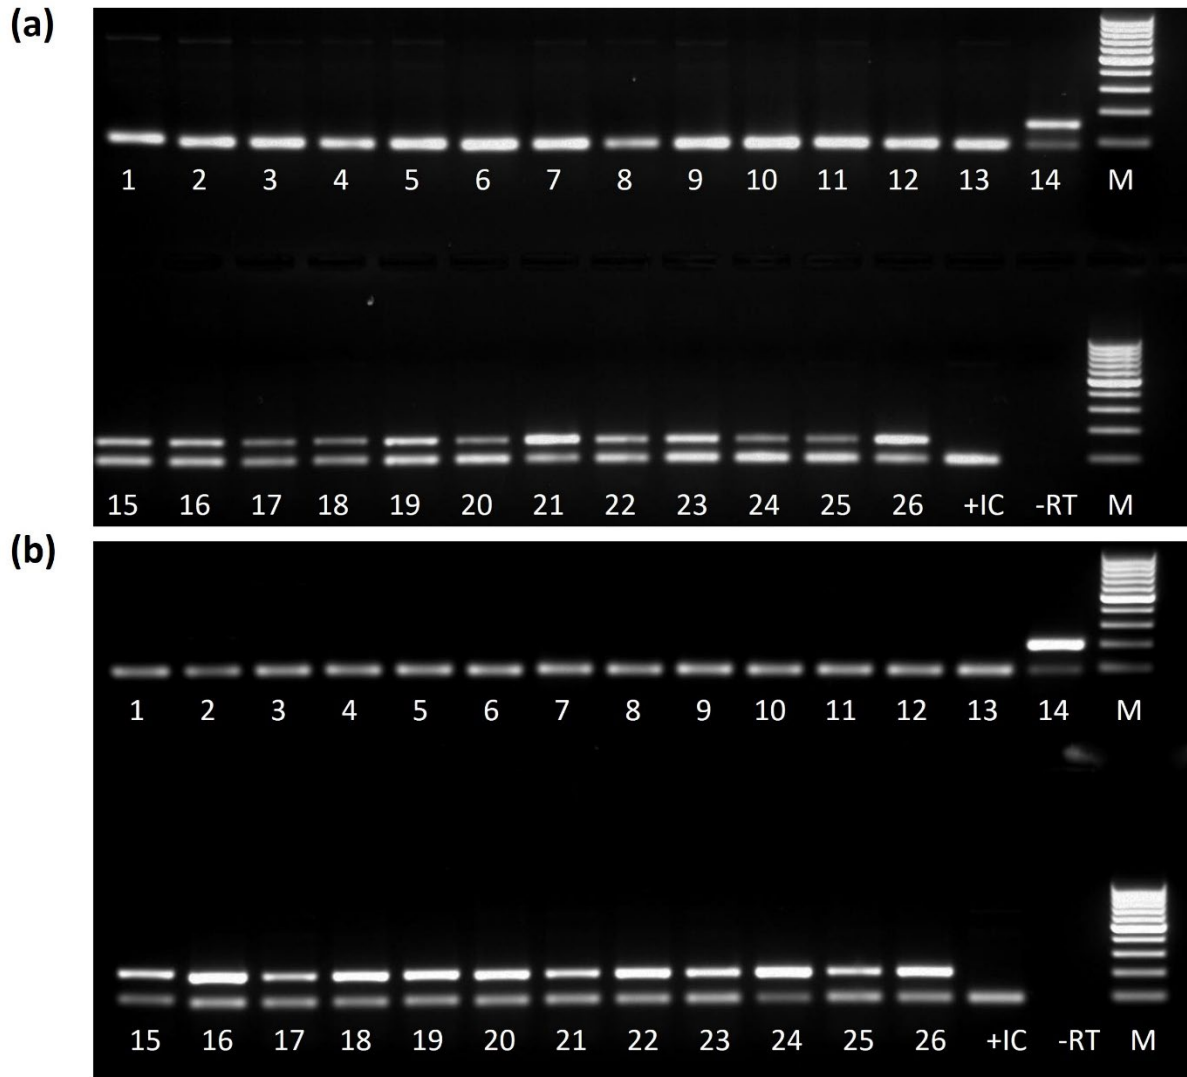

Figure S2. Agarose gel electrophoresis. Multiplex RT-PCR-based assay for testing of CaPV in the International Cocoa Quarantine Centre, Reading (ICQC-R) germplasm. Using P1 (a) or MP (b) virus specific primer set and a 90 bp fragment of internal control (cacao ACP1 gene (LOC18599903)). Loading sequencing is as follows. RB 46 [BRA] (1), RB 49 [BRA] (2), RIM 189 [MEX] (3), EET 95 [ECU] (4), PMCT 93 (5), ARF 12 (6), PA 169 [PER] (7), CC 252 (8), CC 137 (9), EET 183 [ECU] (10), UF 712 (11), CRIOLLO 21 [CRI] (12), APA 5 (13), BE 8 (14), C SUL 3 (15), EET 387 [ECU] (16), BE 5 (17), RB 37 [BRA] (18), RB 43 [BRA] (19), RB 48 [BRA] (20), BE 2 (21), CAS 3 (22), CRIOLLO 17 [CRI] (23), GU 139/A (24), ARF 2 (25) and TSH 1188 (26).. Letter M denotes the lanes loaded with 100 bp size marker.

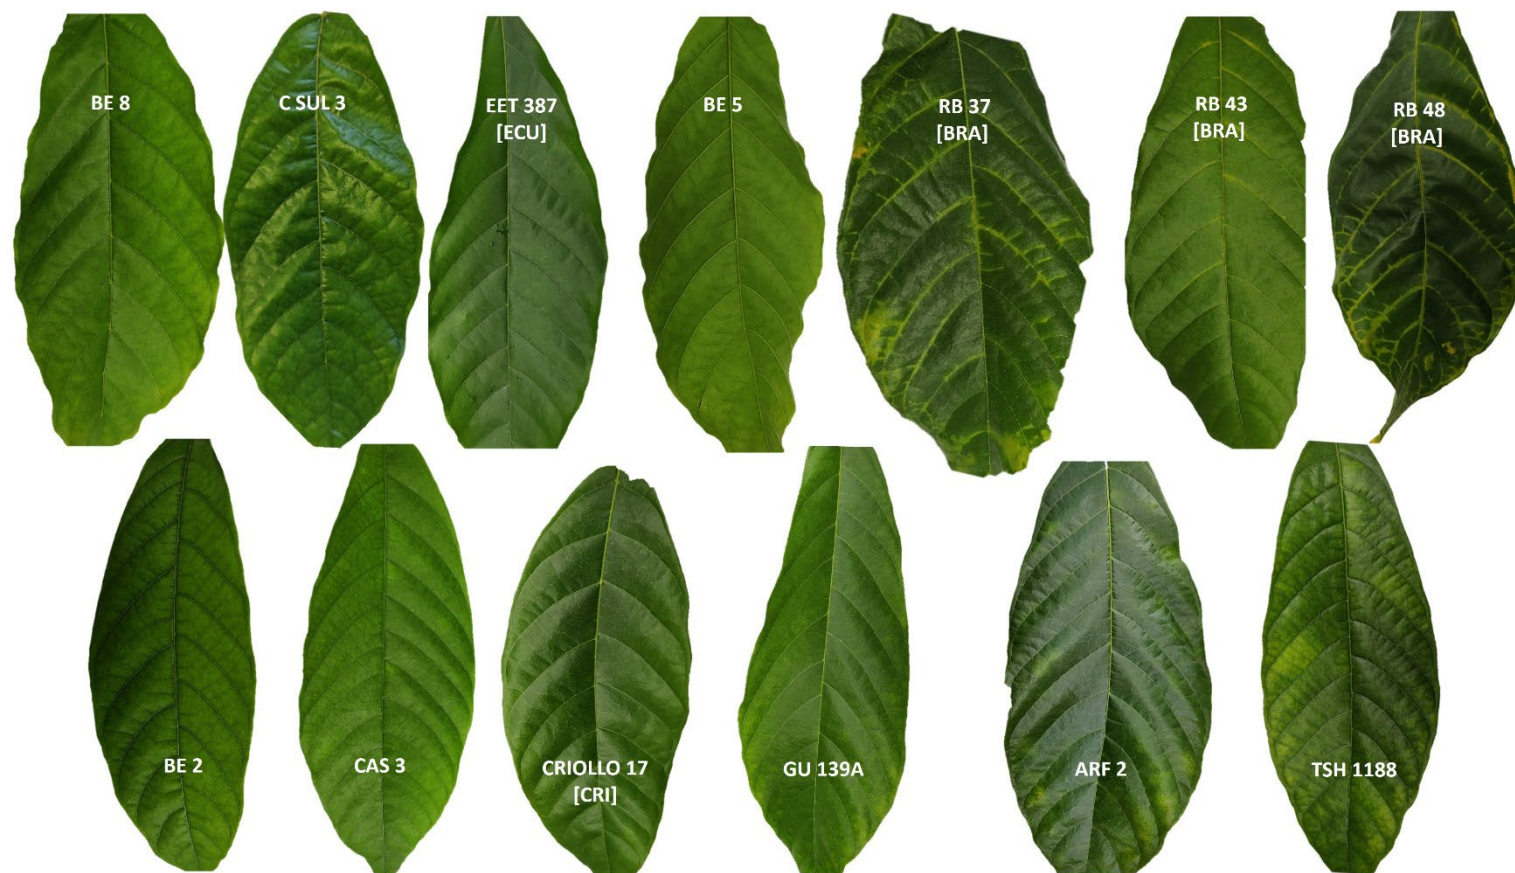

**Figure S3.** Pictures of sampled leaves from the accessions that tested positive for cacao polerovirus. The accessions were imported from Centro Agronómico Tropical de Investigación y Enseñanza (CATIE), Costa Rica, between 2011 and 2021, and are held at International Cocoa Quarantine Centre, Reading, UK (ICQC-R).

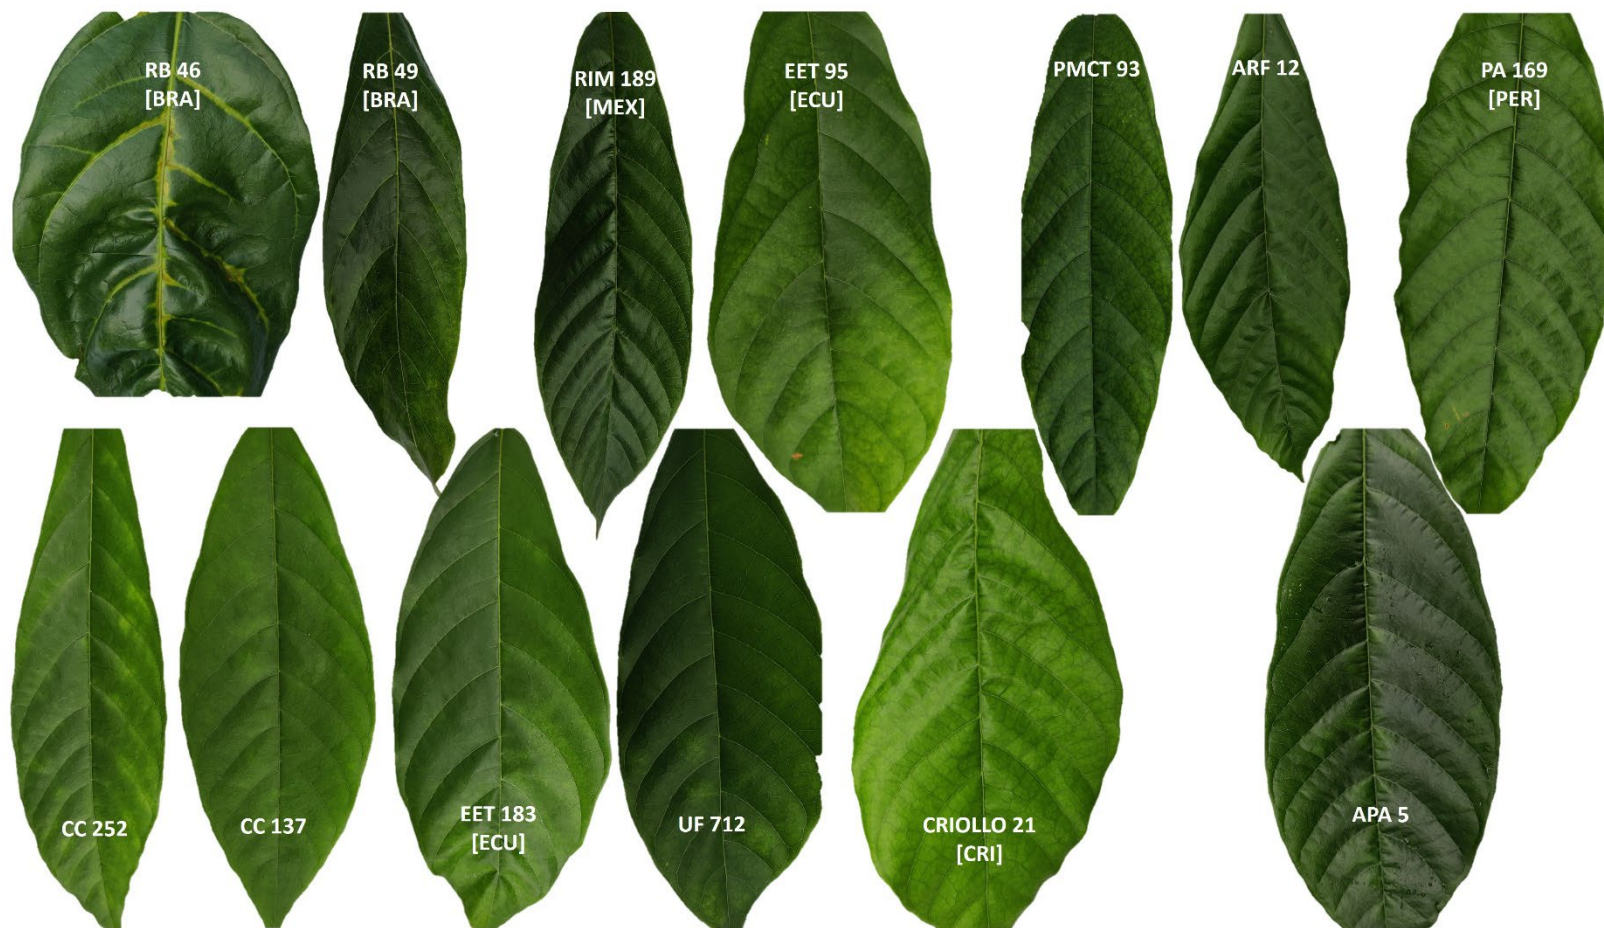

**Figure S4.** Pictures of sampled leaves from the accessions that tested negative for cacao polerovirus. The accessions were imported from Centro Agronómico Tropical de Investigación y Enseñanza (CATIE), Costa Rica, between 1988 and 2011, and are held at International Cocoa Quarantine Centre, Reading, UK (ICQC-R).



**Supplementary tables****Table S1.** Summary of cacao (*Theobroma cacao* L) RNA sequencing datasets used in the study.

| BioProject  | Number of SRA experiments | Read length | Data volume (G bases) | Number of cacao accessions in the study | Year of data release |
|-------------|---------------------------|-------------|-----------------------|-----------------------------------------|----------------------|
| PRJNA971242 | 42                        | 300         | 271                   | 6                                       | 2023                 |
| PRJNA933172 | 388                       | 75          | 267                   | 3                                       | 2023                 |
| PRJNA931994 | 30                        | 101         | 16                    | 3                                       | 2023                 |
| PRJEB35419  | 12                        | 300         | 106                   | 2                                       | 2023                 |
| PRJNA785999 | 13                        | 300         | 87                    | 3                                       | 2022                 |
| PRJNA742476 | 12                        | 100         | 24                    | 1                                       | 2021                 |
| PRJNA714293 | 3                         | 297         | 116                   | 1                                       | 2021                 |
| PRJNA613342 | 9                         | 300         | 61                    | 3                                       | 2020                 |
| PRJNA604260 | 3                         | 300         | 24                    | 1                                       | 2020                 |
| PRJNA558793 | 272                       | 75–281      | 562                   | 40                                      | 2019, 2023           |
| PRJNA476877 | 72                        | 100         | 144                   | 2                                       | 2018                 |
| PRJNA471714 | 36                        | 100         | 73                    | 1                                       | 2018                 |
| PRJNA421343 | 3                         | 300         | 151                   | 1                                       | 2018                 |
| PRJNA413468 | 1                         | 50          | 0.4                   | 1                                       | 2017                 |
| PRJNA326055 | 10                        | 200         | 32                    | 10                                      | 2019                 |
| PRJNA314774 | 20                        | 200         | 60                    | 20                                      | 2016                 |
| PRJNA189464 | 10                        | 96          | 96                    | 1                                       | 2014–2015            |
| PRJNA51633  | 18                        | 108–548     | 88                    | 1                                       | 2015                 |

**Table S2.** Sequence identity of cacao polerovirus isolate discovered in this study with 43 selected species from four genera of the *Solemoviridae* family using amino acid sequences of the coat protein.

| Accession    | Species                            | Genus       | Percent identity (%) |
|--------------|------------------------------------|-------------|----------------------|
| YP_003915151 | Cotton leafroll dwarf virus        | Polerovirus | 57                   |
| YP_001949873 | Melon aphid borne yellows virus    | Polerovirus | 57                   |
| NP_840023    | Cereal yellow dwarf virus RPV      | Polerovirus | 56                   |
| YP_010086858 | Faba bean polerovirus 1            | Polerovirus | 56                   |
| NP_612216    | Beet mild yellowing virus          | Polerovirus | 55                   |
| NP_840099    | Beet western yellows virus         | Polerovirus | 55                   |
| NP_054688    | Cereal yellow dwarf virus RPS      | Polerovirus | 55                   |
| YP_667841    | Chickpea chlorotic stunt virus     | Polerovirus | 55                   |
| NP_620104    | Cucurbit aphid borne yellows virus | Polerovirus | 55                   |
| YP_009506760 | Groundnut rosette assistor virus   | Polerovirus | 55                   |
| YP_006666509 | Suakwa aphid borne yellows virus   | Polerovirus | 55                   |
| NP_620488    | Turnip yellows virus               | Polerovirus | 55                   |
| NP_114362    | Beet chlorosis virus               | Polerovirus | 54                   |
| YP_009254742 | Pepo aphid borne yellows virus     | Polerovirus | 54                   |
| NP_056749    | Potato leafroll virus              | Polerovirus | 53                   |
| YP_010087207 | Pumpkin polerovirus                | Polerovirus | 53                   |
| YP_008083742 | Maize yellow dwarf virus RMV       | Polerovirus | 50                   |
| YP_077189    | Carrot red leaf virus              | Polerovirus | 49                   |
| YP_001931933 | Tobacco vein distorting virus      | Polerovirus | 49                   |
| YP_010782936 | Maize yellow mosaic virus          | Polerovirus | 49                   |
| YP_009455744 | Pepper vein yellows virus 5        | Polerovirus | 49                   |
| NP_050008    | Sugarcane yellow leaf virus        | Polerovirus | 40                   |
| YP_009373266 | Grapevine enamovirus 1             | Enamovirus  | 38                   |
| YP_009249826 | Alfalfa enamovirus 1               | Enamovirus  | 32                   |
| YP_004869652 | Soybean yellow common mosaic virus | Sobemovirus | 29                   |
| YP_009344993 | Solanum nodiflorum mottle virus    | Sobemovirus | 28                   |
| NP_941377    | Cocksfoot mottle virus             | Sobemovirus | 26                   |
| YP_002308437 | Imperata yellow mottle virus       | Sobemovirus | 26                   |
| YP_007438859 | Southern bean mosaic virus         | Sobemovirus | 26                   |
| YP_009140474 | Cymbidium chlorotic mosaic virus   | Sobemovirus | 25                   |
| YP_010087763 | Physalis rugose mosaic virus       | Sobemovirus | 25                   |
| YP_002308463 | Poinsettia latent virus            | Polemovirus | 25                   |
| YP_009142786 | Rottboellia yellow mottle virus    | Sobemovirus | 25                   |
| YP_007438863 | Rice yellow mottle virus           | Sobemovirus | 24                   |
| YP_007438851 | Lucerne transient streak virus     | Sobemovirus | 23                   |
| YP_008869288 | Turnip rosette virus               | Sobemovirus | 23                   |
| YP_003896040 | Velvet tobacco mottle virus        | Sobemovirus | 23                   |
| YP_002158815 | Sowbane mosaic virus               | Sobemovirus | 22                   |
| YP_006331063 | Artemisia virus A                  | Sobemovirus | 21                   |
| YP_006589927 | Papaya lethal yellowing virus      | Sobemovirus | 21                   |
| YP_007438855 | Ryegrass mottle virus              | Sobemovirus | 21                   |
| NP_715629    | Subterranean clover mottle virus   | Sobemovirus | 21                   |
| NP_042303    | Southern cowpea mosaic virus       | Sobemovirus | 18                   |

**Table S3.** Sequence identity of cacao polerovirus isolate discovered in this study with 43 selected species from four genera of *Solemoviridae* family using amino acid sequences of RNA-directed RNA polymerase.

| Accession    | Species                            | Genus       | Percent identity (%) |
|--------------|------------------------------------|-------------|----------------------|
| YP 002308462 | Poinsettia latent virus            | Polemovirus | 62                   |
| NP 050007    | Sugarcane yellow leaf virus        | Polerovirus | 58                   |
| NP 620479    | Beet mild yellowing virus          | Polerovirus | 50                   |
| NP 620485    | Turnip yellows virus               | Polerovirus | 49                   |
| NP 056748    | Potato leafroll virus              | Polerovirus | 49                   |
| YP 077186    | Carrot red leaf virus              | Polerovirus | 48                   |
| YP 010800294 | Groundnut rosette assistor virus   | Polerovirus | 48                   |
| NP 620101    | Cucurbit aphid borne yellows virus | Polerovirus | 48                   |
| YP 003915148 | Cotton leafroll dwarf virus        | Polerovirus | 48                   |
| YP 009455740 | Pepper vein yellows virus 5        | Polerovirus | 48                   |
| YP 008083739 | Maize yellow dwarf virus RMV       | Polerovirus | 48                   |
| YP 010086855 | Faba bean polerovirus 1            | Polerovirus | 47                   |
| YP 010782933 | Maize yellow mosaic virus          | Polerovirus | 47                   |
| YP 001949870 | Melon aphid borne yellows virus    | Polerovirus | 47                   |
| NP 840097    | Beet western yellows virus         | Polerovirus | 47                   |
| NP 840022    | Cereal yellow dwarf virus RPV      | Polerovirus | 47                   |
| NP 054685    | Cereal yellow dwarf virus RPS      | Polerovirus | 46                   |
| YP 667838    | Chickpea chlorotic stunt virus     | Polerovirus | 46                   |
| YP 001931931 | Tobacco vein distorting virus      | Polerovirus | 45                   |
| YP 009254738 | Pepo aphid borne yellows virus     | Polerovirus | 45                   |
| NP 114361    | Beet chlorosis virus               | Polerovirus | 44                   |
| YP 010087203 | Pumpkin polerovirus                | Polerovirus | 43                   |
| YP 006666506 | Suakwa aphid borne yellows virus   | Polerovirus | 43                   |
| NP 736581    | Subterranean clover mottle virus   | Sobemovirus | 39                   |
| YP 010087762 | Physalis rugose mosaic virus       | Sobemovirus | 39                   |
| NP 942020    | Cocksfoot mottle virus             | Sobemovirus | 37                   |
| YP 010790432 | Grapevine enamovirus 1             | Enamovirus  | 34                   |
| YP 009249823 | Alfalfa enamovirus 1               | Enamovirus  | 33                   |
| YP 009142784 | Rottboellia yellow mottle virus    | Sobemovirus | 32                   |
| YP 008869286 | Turnip rosette virus               | Sobemovirus | 32                   |
| YP 006589925 | Papaya lethal yellowing virus      | Sobemovirus | 32                   |
| YP 009140472 | Cymbidium chlorotic mosaic virus   | Sobemovirus | 31                   |
| YP 009344991 | Solanum nodiflorum mottle virus    | Sobemovirus | 31                   |
| YP 003896039 | Velvet tobacco mottle virus        | Sobemovirus | 31                   |
| YP 007438858 | Southern bean mosaic virus         | Sobemovirus | 31                   |
| NP 042302    | Southern cowpea mosaic virus       | Sobemovirus | 31                   |
| YP 002158813 | Sowbane mosaic virus               | Sobemovirus | 30                   |
| YP 004869651 | Soybean yellow common mosaic virus | Sobemovirus | 30                   |
| YP 007438853 | Ryegrass mottle virus              | Sobemovirus | 30                   |
| YP 007500964 | Rice yellow mottle virus           | Sobemovirus | 29                   |
| YP 007438849 | Lucerne transient streak virus     | Sobemovirus | 29                   |
| YP 006331061 | Artemisia virus A                  | Sobemovirus | 28                   |
| YP 007506946 | Imperata yellow mottle virus       | Sobemovirus | 28                   |

**Table S4.** Summary of multiplex RT-PCR test for the detection of cacao polerovirus in selected germplasm, held at International Cocoa Quarantine Centre, Reading, UK (ICQC-R). The accessions were imported from Centro Agronómico Tropical de Investigación y Enseñanza (CATIE), Costa Rica, between 1988 and 2021.

| Serial number | Accession name   | ICQC Number | Import year | Test result |
|---------------|------------------|-------------|-------------|-------------|
| 1             | RB 46 [BRA]      | RUQ 0134    | 1988        | -ve         |
| 2             | RB 49 [BRA]      | RUQ 0136    | 1988        | -ve         |
| 3             | RIM 189 [MEX]    | RUQ 0310    | 1992        | -ve         |
| 4             | EET 95 [ECU]     | RUQ 0414    | 1993        | -ve         |
| 5             | PMCT 93          | RUQ 1249    | 2002        | -ve         |
| 6             | ARF 12           | RUQ 1364    | 2003        | -ve         |
| 7             | PA 169 [PER]     | RUQ 1479    | 2004        | -ve         |
| 8             | CC 252           | RUQ 1506    | 2004        | -ve         |
| 9             | CC 137           | RUQ 1637    | 2007        | -ve         |
| 10            | EET 183 [ECU]    | RUQ 1640    | 2007        | -ve         |
| 11            | UF 712           | RUQ 1683    | 2009        | -ve         |
| 12            | CRIOLLO 21 [CRI] | RUQ 1682    | 2009        | -ve         |
| 13            | APA 5            | RUQ 1695    | 2011        | -ve         |
| 14            | BE 8             | RUQ 1694    | 2011        | +ve         |
| 15            | C SUL 3          | RUQ 1704    | 2013        | +ve         |
| 16            | EET 387 [ECU]    | RUQ 1703    | 2013        | +ve         |
| 17            | BE 5             | RUQ 1719    | 2013        | +ve         |
| 18            | RB 37 [BRA]      | RUQ 1705    | 2013        | +ve         |
| 19            | RB 43 [BRA]      | RUQ 1717    | 2013        | +ve         |
| 20            | RB 48 [BRA]      | RUQ 1720    | 2013        | +ve         |
| 21            | BE 2             | RUQ 1733    | 2015        | +ve         |
| 22            | CAS 3            | RUQ 1744    | 2016        | +ve         |
| 23            | CRIOLLO 17 [CRI] | RUQ 1742    | 2016        | +ve         |
| 24            | GU 139 /A        | RUQ 1760    | 2020        | +ve         |
| 25            | ARF 2            | RUQ 1762    | 2021        | +ve         |
| 26            | TSH 1188         | RUQ 1761    | 2021        | +ve         |
